# Supplementary material for: Confined gold nanoparticles enhance the detection of small molecules in label-free impedance aptasensors
Source: Royal Society of Chemistry journal article supplement (doi:10.1039/c5nr01429h), 2015-01-01
Supplement: c5nr01429h1.pdf [file c5nr01429h1.pdf]

SUPPLEMENTARY ELECTRONIC INFORMATION

**Confined Gold Nanoparticles Enhance the Detection of Small Molecules in Label-Free Impedance Aptasensors**

A. S. Peinetti,<sup>a</sup> Helena Ceretti,<sup>b</sup> M. Mizrahi,<sup>c</sup> G. A. González,<sup>a</sup> S. A. Ramírez,<sup>b</sup> F. Requejo,<sup>c</sup> J. M. Montserrat,<sup>b,\*</sup> F. Battaglini<sup>a,\*</sup>

**X ray techniques.** Structural parameters, such as coordination numbers (N), bond lengths (R) and their mean squared disorders ( $\sigma^2$ ) were obtained by a nonlinear least squares fit of the theoretical EXAFS signal to the data in R space by Fourier transforming both the theory and the data. Theoretical scattering path amplitudes and phase shifts for all paths used in the fits were calculated using the FEFF6 code.<sup>S1</sup> The k range was set from 2 to 11.5 Å<sup>-1</sup> and the Fourier transform was fitted between 1.5 to 3.3 Å. The passive reduction factor S0<sup>2</sup> obtained was 0.88. That value was calculated by fitting of metallic Au foils standards by constraining the coordination number in these compounds of known crystalline structure.

| Sample                                     | L <sub>3</sub> -Au |                        |                                      |                   |                       |                                     | Diameter (nm) |
|--------------------------------------------|--------------------|------------------------|--------------------------------------|-------------------|-----------------------|-------------------------------------|---------------|
|                                            | N <sub>Au-Au</sub> | R <sub>Au-Au</sub> (Å) | $\sigma^2_{Au-Au}$ (Å <sup>2</sup> ) | N <sub>Au-S</sub> | R <sub>Au-S</sub> (Å) | $\sigma^2_{Au-S}$ (Å <sup>2</sup> ) |               |
| Metallic Au                                | 12                 | 2.880(2)               | 0.0082(3)                            | -                 | -                     | -                                   | -             |
| Al/Al <sub>2</sub> O <sub>3</sub> /AuNP    | 9.7(6)             | 2.863(4)               | 0.0082(6)                            | -                 | -                     | -                                   | 2.2(5)        |
| Al/Al <sub>2</sub> O <sub>3</sub> /AuNP/SR | 9.8(8)             | 2.836(5)               | 0.0075(6)                            | 0.22(8)           | 2.340(5)              | 0.003(1)                            | 2.3(7)        |

**Table S1.** Fitted values from EXAFS signal for the average coordination number (N), interatomic distance (R) and Debye-Waller factor ( $\sigma^2$ ), for the first coordination shell around Au atoms, together with the estimated diameter for the samples. The coordination number was fixed at 12 for metallic Au.

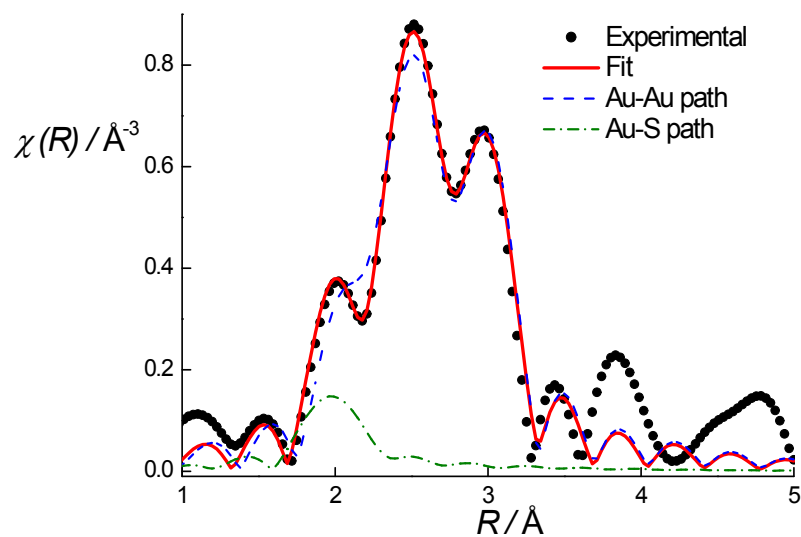

**Figure S1.** Fourier transform of the EXAFS oscillation (solid circles) and fit of the Al/Al<sub>2</sub>O<sub>3</sub>/AuNP/SR sample (red line). Dashed blue line and dashed-dot green line indicate the Au-Au and Au-S contributions, respectively.

#### References

[S1] S.I. Zabinski, J.J. Rehr, A. Ankudinov, R.C. Albers, M.J. Eller, *Phys. Rev. B* **1995**, *52*, 2995e3009.
